# Supplementary material for: A reduced polyoxometalate-encapsulated organo cobalt modified phosphate framework for improving photocatalytic reduction of CO2
Source: Royal Society of Chemistry journal article supplement (doi:10.1039/d4dt00812j), 2024-01-01
Supplement: d4dt00812j1.pdf [file d4dt00812j1.pdf]

## Supplementary Information

# Reduced Polyoxometalate-Encapsulated Organo Cobalt modified phosphate Framework for improving photocatalytic reduction CO<sub>2</sub>

Yinhua Zhu, Pinfang Yan, Lingtong Xu, Zeyu Du, Hua Mei,\* Yan Xu\*

College of Chemistry and Chemical Engineering, Nanjing Tech University, Nanjing 210009,  
P.R. China

## Section 1. Crystal Structure

**Fig. S1** The crystal image of Co-PO<sub>4</sub>-PW<sub>12</sub> under optical microscope.

**Fig. S2** SEM image of Co-PO<sub>4</sub>-PW<sub>12</sub>.

**Fig. S3** Stick and polyhedral representation of basic unit for Co-PO<sub>4</sub>-PW<sub>12</sub>.

**Fig. S4** Size perspective of the assembled structure for Co-PO<sub>4</sub>-PW<sub>12</sub>.

## Section 2. Characterizations

### 2.1 Materials and Physical property studies.

### 2.2 Preparation of [Co<sub>4</sub>(PO<sub>4</sub>)(C<sub>7</sub>H<sub>8</sub>N<sub>4</sub>)<sub>6</sub>](PW<sup>VI</sup><sub>10</sub>W<sup>V</sup><sub>2</sub>O<sub>40</sub>)

**Fig. S5** The PXRD pattern of Co-PO<sub>4</sub>-PW<sub>12</sub>.

**Fig. S6** PXRD patterns of 10 mg Co-PO<sub>4</sub>-PW<sub>12</sub> under the conditions of the specified photocatalytic reaction solution (MeCN: TEOA = 4:1 v/v, 50 mL) by soaking the samples for 24 h compared with the simulated curve.

**Fig. S7** PXRD of Co-PO<sub>4</sub>-PW<sub>12</sub> after reaction

**Fig. S8** The FT-IR pattern of Co-PO<sub>4</sub>-PW<sub>12</sub>.

**Fig. S9** The TG curves of Co-PO<sub>4</sub>-PW<sub>12</sub>.

**Fig. S10** The XPS spectrum of Co2p peaks for Co-PO<sub>4</sub>-PW<sub>12</sub>.

## Section 3. The Procedure of the CO<sub>2</sub> Photoreduction

### 3.1 Electrochemical measurements.

### 3.2 Photocatalytic CO<sub>2</sub> reduction experiments.

**Fig. S11** The photograph of the CO<sub>2</sub> photoreduction devices.

**Fig. S12** The recycling experiment.

**Fig. S13** The FT-IR pattern before and after the reaction.

**Table S1.** The comparison for the partially reported materials in the CO<sub>2</sub> photoreduction system.

## Section 4. Crystal data

**Table S2** Sectional crystal data and structure refinements for **Co-PO<sub>4</sub>-PW<sub>12</sub>**.

## Section 1. Crystal Structure

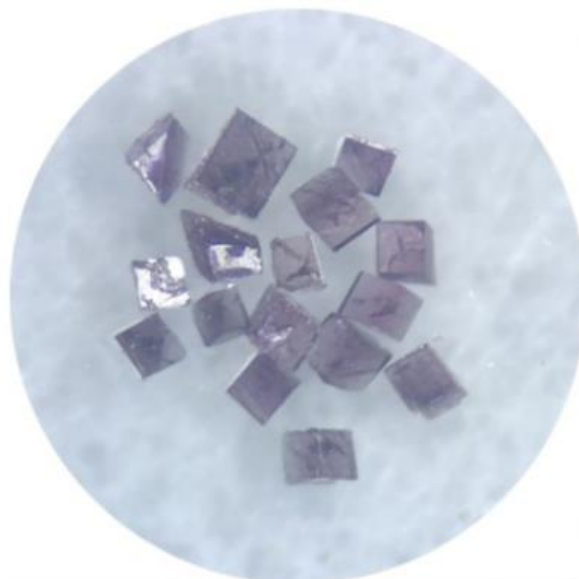

**Fig. S1** The crystal image of **Co-PO<sub>4</sub>-PW<sub>12</sub>** under optical microscope.

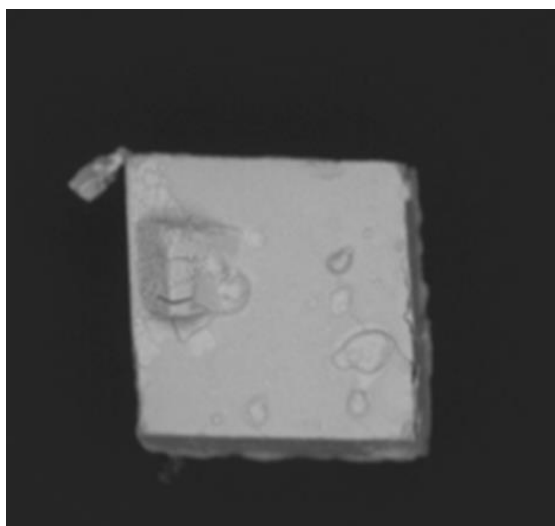

**Fig. S2** SEM image of  $\text{Co-PO}_4\text{-PW}_{12}$ .

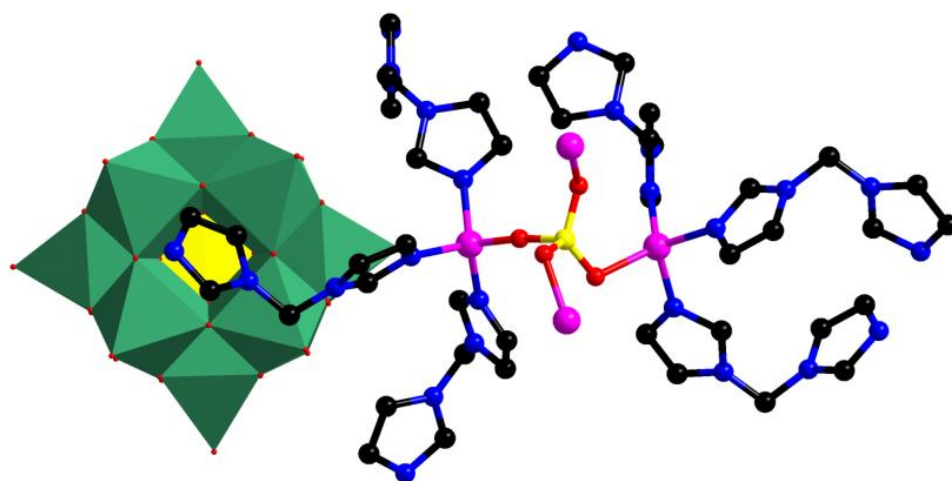

**Fig. S3** Stick and polyhedral representation of basic unit for  $\text{Co-PO}_4\text{-PW}_{12}$ .

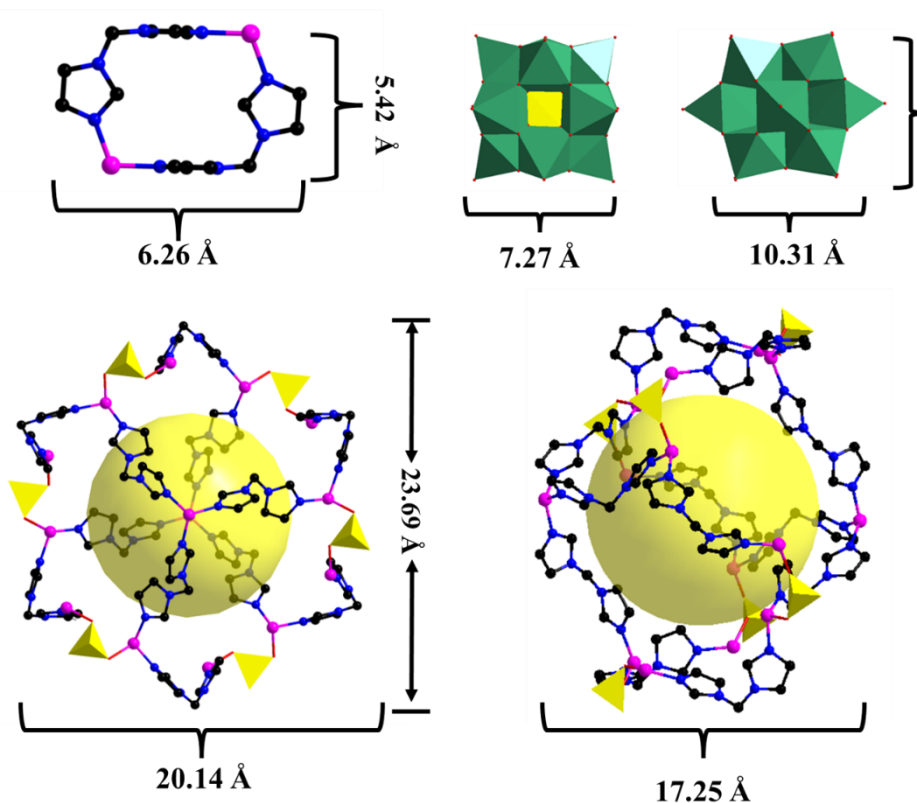

Fig. S4 Size perspective of the assembled structure for **Co-PO<sub>4</sub>-PW<sub>12</sub>**.

## Section 2. Characterizations

CoCl<sub>2</sub>·6H<sub>2</sub>O (AR, ≥ 99.0%) and Na<sub>2</sub>HPO<sub>4</sub> (AR, ≥ 99.0%) were bought from Sinopharm Chemical Reagent Co., Ltd. [Ru(2,2'-bipyridine)<sub>3</sub>]Cl<sub>2</sub>·6H<sub>2</sub>O (98.0 %) was bought from Aladdin. Triethanolamine (AR, ≥78.0 %) and acetonitrile (AR, ≥ 99.8%) were purchased from Shanghai Ling Feng chemical agent Ltd. Nafion solution (5 wt %) was purchased from Sigma-Aldrich. Carbon dioxide (CO<sub>2</sub>, 99.999%) gas was supplied by Jiangsu Tianhong Chemical Co.,Ltd, the <sup>13</sup>CO<sub>2</sub> (99%) was purchased from Guangzhou Puyuan Gas Co., Ltd.

### 2.1 Materials and Physical property studies.

Powder X-ray diffraction (PXRD) data of **Co-PO<sub>4</sub>-PW<sub>12</sub>** was carried out on Smartlab TM 9KW diffractometer using Cu K $\alpha$  radiation ( $\lambda = 1.54056$  nm), and the range was 5 to 50°. FT-IR spectrums were performed on Nicolet 470 FTIR spectrometer with KBr pellets in the 400-4000 cm<sup>-1</sup> range. Thermogravimetric (TG) curve was completed on STA449F3 thermogravimetric analyzer in N<sub>2</sub> atmosphere with a heating rate of 10 °C/min. The UV-vis diffuse reflectance spectra were investigated via SHIMADZU UV-2600 spectrophotometer,

and the wavelength was in range of 200-800 nm. The SEM were identified by using a Hitachi TM 3000 scanning electron microscope at an accelerating voltage of 20 kV. Elemental analyses (C, N and H) were determined by a Perkin-Elmer 2400 elemental analyzer.

## 2.2 Preparation of $[\text{Co}_4(\text{PO}_4)(\text{C}_7\text{H}_8\text{N}_4)_6](\text{PW}_{10}\text{W}^{\text{V}}_2\text{O}_{40})$

1,1'-Methylenebis(1H-imidazole) (Bim) was synthesized according to the known literature method.<sup>[1]</sup>

The following substances were dissolved in 8 mL of deionized water:  $\text{CoCl}_2 \cdot 6\text{H}_2\text{O}$  (0.05 g, 0.21 mmol),  $\text{H}_3\text{PW}_{12}\text{O}_{40} \cdot 18\text{H}_2\text{O}$  (0.10 g, 0.03 mmol),  $\text{C}_7\text{H}_8\text{N}_4$  (Bim ligand) (0.05 g, 0.34 mmol), and  $\text{Na}_2\text{HPO}_4$  (0.02 g, 0.14 mmol). The slurry was vigorously stirred at 25°C for 30 minutes, and then the pH was raised to 3.5 by adding 1 M hydrochloric acid, followed by 7 days of heating to 140°C. In order to gain purple polyhedral-like crystals, the autoclave was cleaned with deionized water after being cooled to room temperature. Yield: 15.64% (based on  $\text{H}_3\text{PW}_{12}\text{O}_{40} \cdot 18\text{H}_2\text{O}$ ). Elemental analysis: experimental values: C: 12.60%, H: 1.21%, N: 8.23%; Theoretical values: C: 12.3%, H: 1.17%, N: 8.20%.

[1] X. Wang, M. M. Zhang, X. L. Hao, Y. H. Wang, Y. Wei, F. S. Liang, L. J. Xu, Y. G. Li, *Cryst. Growth Des.*, 2013, **13**, 3454-3462.

## PXRD

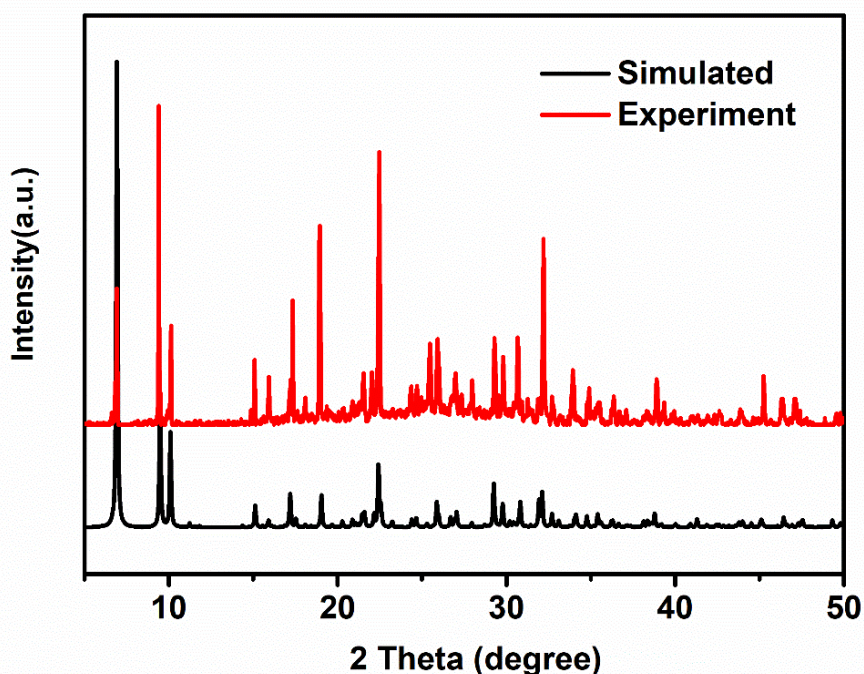

Fig. S5 The PXRD pattern of  $\text{Co-PO}_4\text{-PW}_{12}$ .

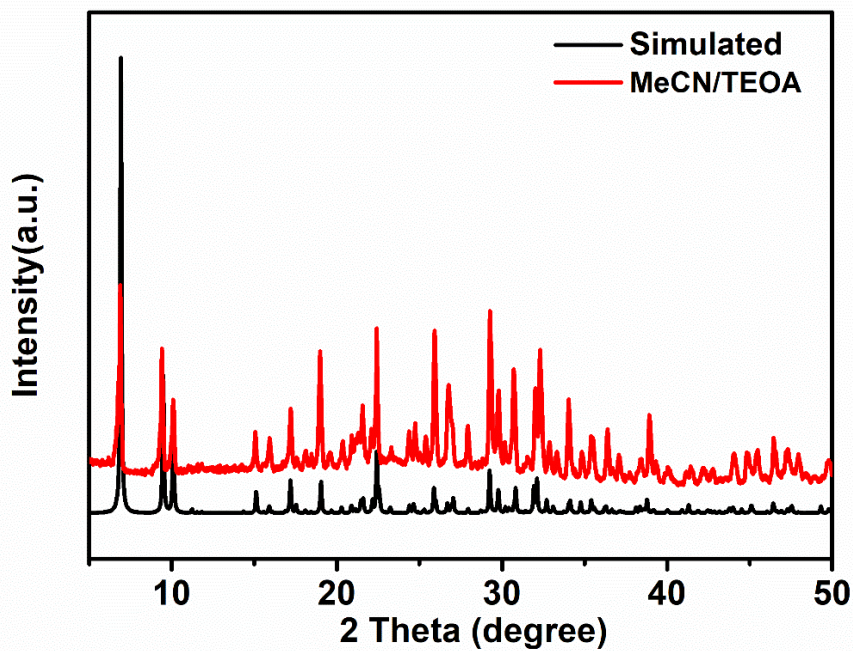

**Fig. S6** PXRD patterns of 10 mg  $\text{Co-PO}_4\text{-PW}_{12}$  under the conditions of the specified photocatalytic reaction solution (MeCN: TEOA = 4:1 v/v, 50 mL) by soaking the samples for 24 h compared with the simulated curve.

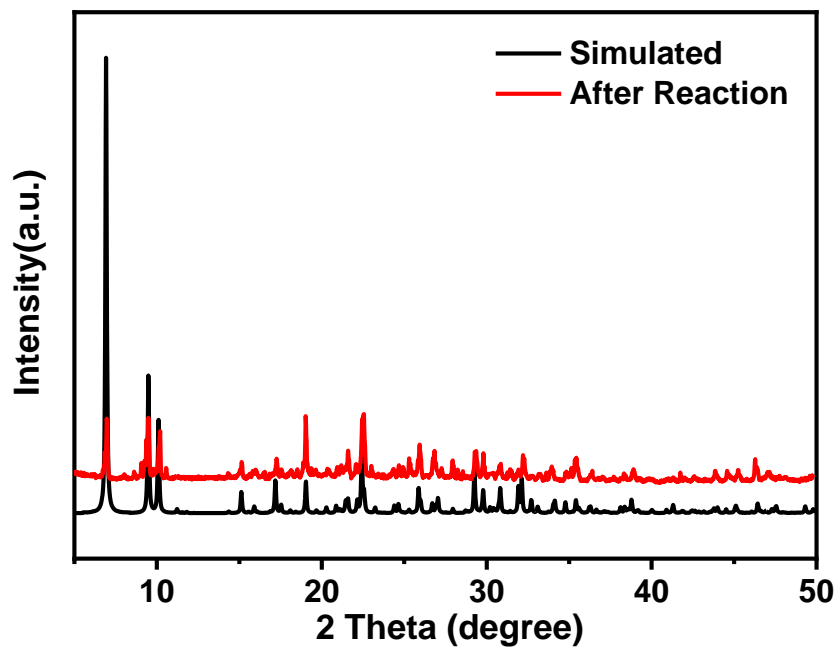

**Fig. S7** PXRD of  $\text{Co-PO}_4\text{-PW}_{12}$  after reaction

## FT-IR

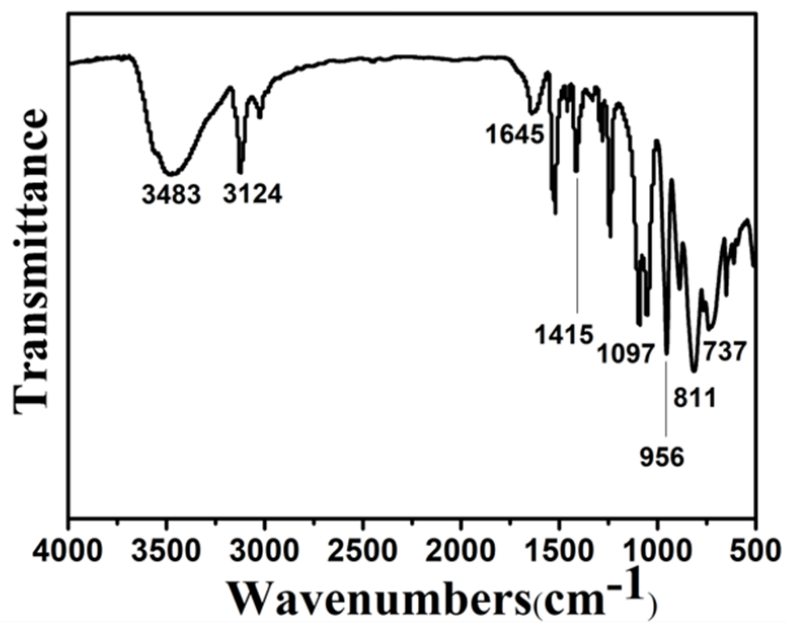

Fig. S8 The FT-IR pattern of Co-PO<sub>4</sub>-PW<sub>12</sub>.

## TG

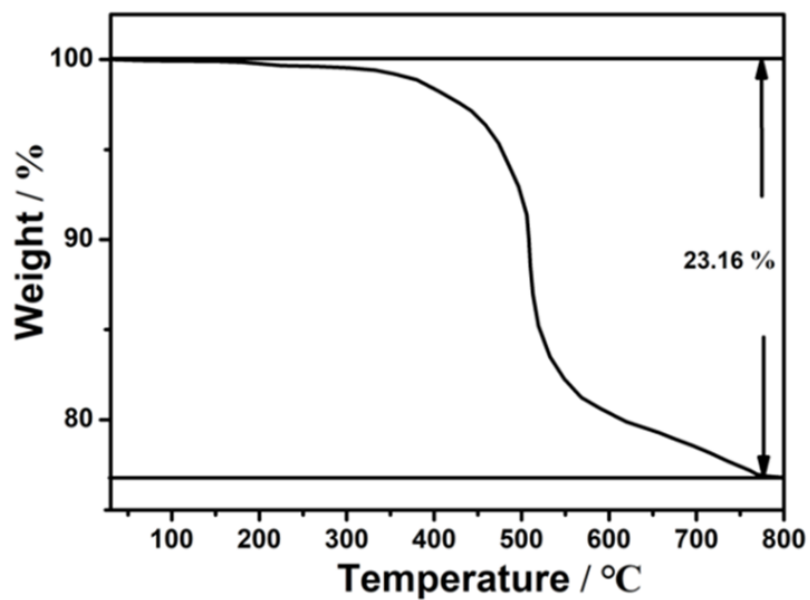

Fig. S9 The TG curve of Co-PO<sub>4</sub>-PW<sub>12</sub>.

## XPS



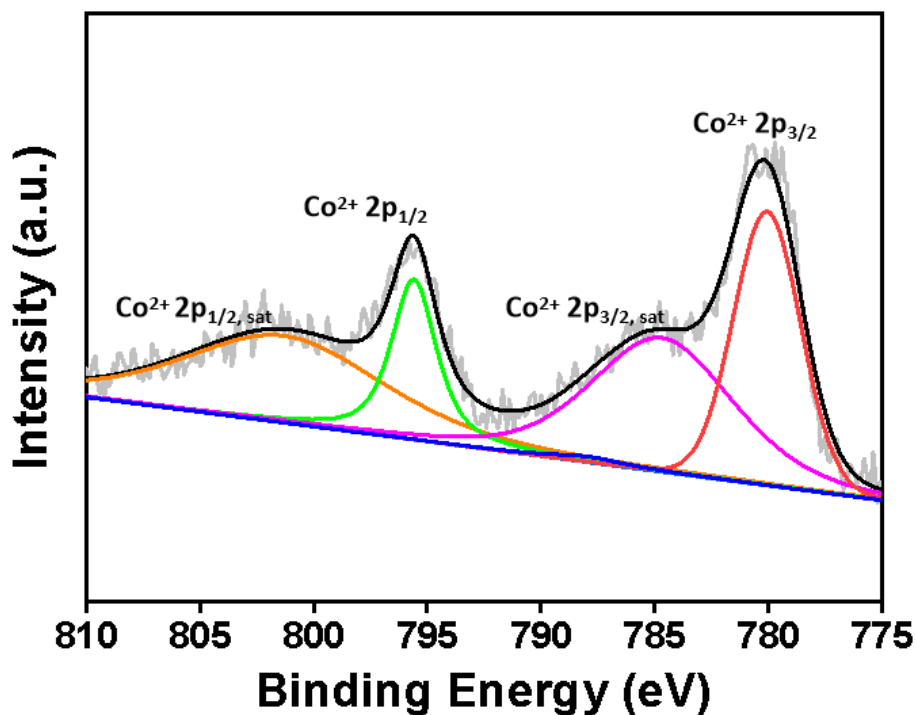

Fig. S10 The XPS spectrum of Co2p peaks for **Co-PO<sub>4</sub>-PW<sub>12</sub>**.

## Section 3. The Procedure of the CO<sub>2</sub> Photoreduction

### 3.1 Electrochemical measurements.

The Mott–Schottky spots were carried out at ambient environment via using the electrochemical workstation (CHI 760e) in a standard three-electrode system: The carbon cloth (CC, 1 cm×1 cm) modified with catalyst samples, carbon rod and Ag/AgCl were used as the working electrode, counter electrode and the reference electrode, respectively. The catalyst of 5 mg was grinded to powder and then dispersed in 1 mL of 0.5% Nafion solvent by ultrasonication to form a homogeneous ink. Subsequently, 200 μL of the ink were deposited onto the carbon cloth, and dried in room temperature for Mott-Schottky spots measurements. The Mott-Schottky plots were measured over an alternating current (AC) frequency of 1000 Hz, 1500 Hz and 2000 Hz, and three electrodes were immersed in the 0.2 M Na<sub>2</sub>SO<sub>4</sub> aqueous solution.

### 3.2 Photocatalytic CO<sub>2</sub> reduction experiments.

The photocatalytic performance of **Co-PO<sub>4</sub>-PW<sub>12</sub>** was evaluated by applying it to the photocatalytic reduction of CO<sub>2</sub> (CEL-PAEM-D8, AULTT, China). The experiments were carried out in a 100 mL Pyrex flask. A 300 W xenon arc lamp (CEL-PF300-T8, AULTT, China) (photocurrent: 15A) was employed as a visible-light source through a UV-cutoff filter with a



wavelength greater than 420 nm, which was installed 10 cm away from the reaction solution. In the system of CO<sub>2</sub> photocatalytic reduction, we put photocatalyst into a mixed solvent of triethanolamine (TEOA, as a sacrificial base) and acetonitrile (1:4 v/v, 50 mL), and used [Ru(bpy)<sub>3</sub>]Cl<sub>2</sub>•6H<sub>2</sub>O (11.3 mg) as photosensitizer. The products were analyzed by performing gas chromatography (GC7920-TF2Z, AULTT, China). The amount of CO and CH<sub>4</sub> was detected by FID, and the H<sub>2</sub> was analyzed by TCD.

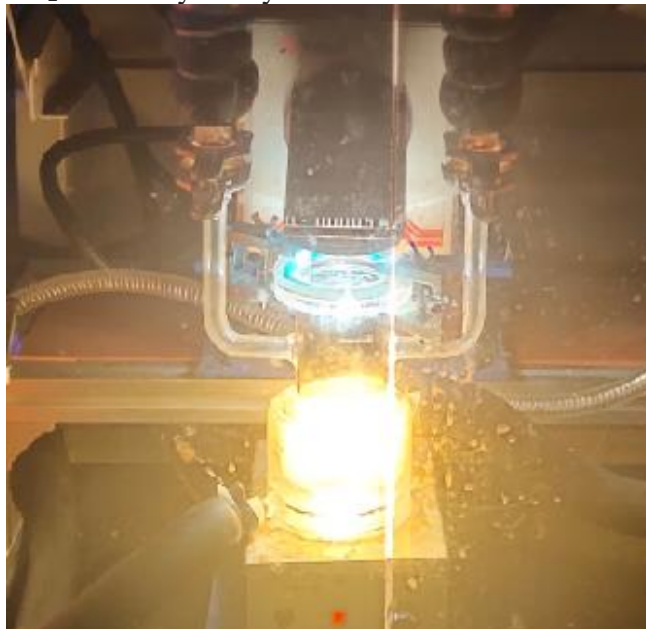

**Fig. S11** The photograph of the CO<sub>2</sub> photoreduction devices.

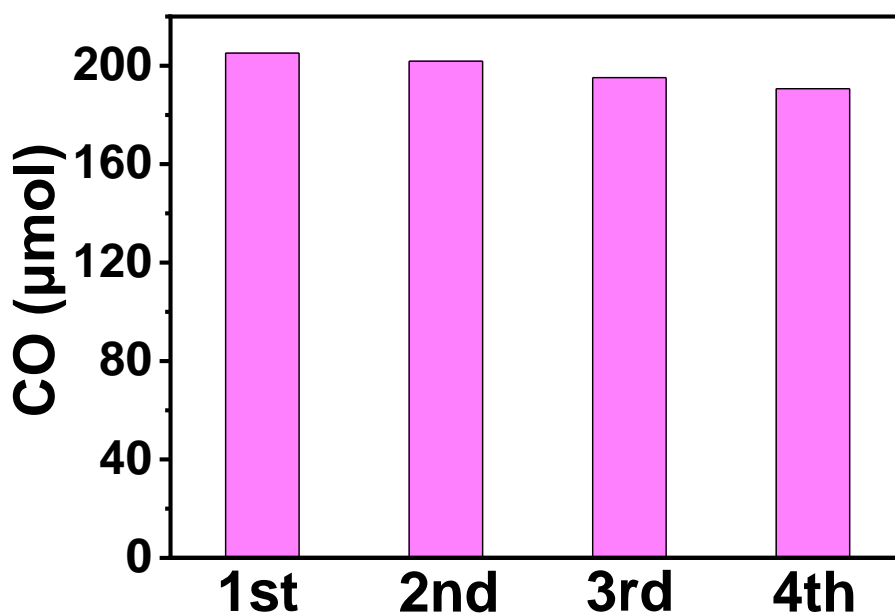

**Fig. S12** The recycling experiment.

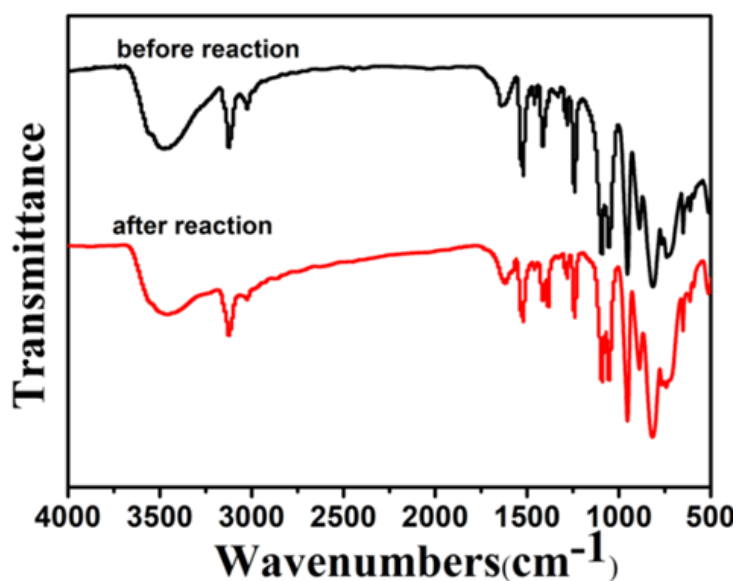

**Fig. S13** The FT-IR pattern before and after the reaction.

**Table S1.** The comparison for the partially reported materials in CO<sub>2</sub> photoreduction system.

| Photocatalysts                                                                                                                                                                                                                                                                                                                                                                         | Reaction time (h) | product         | Yield ( $\mu\text{mol g}^{-1}$ ) | References                                                          |
|----------------------------------------------------------------------------------------------------------------------------------------------------------------------------------------------------------------------------------------------------------------------------------------------------------------------------------------------------------------------------------------|-------------------|-----------------|----------------------------------|---------------------------------------------------------------------|
| $[\text{Co}_4(\text{PO}_4)(\text{C}_7\text{H}_8\text{N}_4)_6]$<br>( $\text{PW}_{10}\text{W}^{\text{V}}_2\text{O}_{40}$ )                                                                                                                                                                                                                                                               | 5                 | CO              | 68,380                           | This work                                                           |
| 1-DMF                                                                                                                                                                                                                                                                                                                                                                                  | 8                 | CO              | 448                              | <i>Dalton Trans.</i> ,<br><b>2019</b> , 48, 8678-8692.              |
| Co-UiO-67                                                                                                                                                                                                                                                                                                                                                                              | 4                 | CO              | 13,170                           | <i>ACS Appl. Mater. Interfaces</i> , <b>2020</b> , 12, 24059-24065. |
| $\text{H}_{26.5}\text{K}_{2.5}\text{Na}(\text{H}_2\text{O})_{16}[\text{Ni}_6(\text{O}(\text{H})(\text{BO}_3)_2(\text{dien})_2(\text{B}-\alpha\text{-SiW}_{10}\text{O}_{37})_2)_2] \cdot 24\text{H}_2\text{O}$                                                                                                                                                                          | 1                 | CO              | 6988                             | <i>Inorg. Chem. Front.</i> , <b>2021</b> , 8, 1303-1311.            |
| $[\text{K}(\text{H}_2\text{O})_2\text{Fe}^{\text{II}}_{0.33}\text{Co}_{0.67}(\text{H}_2\text{O})_2(\text{DAPSC})_2]\{[\text{Fe}^{\text{II}}_{0.3}\text{Co}_{0.67}(\text{H}_2\text{O})(\text{DAPSC})_2][\text{Fe}^{\text{II}}_{0.33}\text{Co}_{0.67}(\text{H}_2\text{O})_4]_2[\text{Na}_2\text{Fe}^{\text{III}}_4\text{P}_4\text{W}_{32}\text{O}_{120}]\} \cdot 21.5\text{H}_2\text{O}$ | 8                 | CO              | 55,080                           | <i>Dalton Trans.</i> , <b>2023</b> , 52, 9465.                      |
| $\text{Cu}_3(\text{BTC})_2@\text{TiO}_2$                                                                                                                                                                                                                                                                                                                                               | 4                 | CH <sub>4</sub> | 11                               | <i>Adv. Mater.</i> , <b>2014</b> ; 26: 4783–4788.                   |

|                                                                                                      |     |                                           |                        |                                                                 |
|------------------------------------------------------------------------------------------------------|-----|-------------------------------------------|------------------------|-----------------------------------------------------------------|
| TiO <sub>2</sub> -Mg-CPO-27                                                                          | 10  | CH <sub>4</sub><br>CO                     | 40.9<br>23.5           | <i>Appl. Catal. B Environ.</i> , <b>2016</b> ; 183: 47-52.      |
| MOF-525                                                                                              | 6   | CH <sub>4</sub><br>CO                     | 37<br>384              | <i>Angew. Chem. Int. Ed.</i> , <b>2016</b> ; 55: 14310 – 14314. |
| MOF-525-Zn                                                                                           | 6   | CH <sub>4</sub><br>CO                     | 70<br>670              |                                                                 |
| MOF-525-Co                                                                                           | 6   | CH <sub>4</sub><br>CO                     | 221<br>1204            |                                                                 |
| ZrPP-1-Co                                                                                            | 15  | CH <sub>4</sub><br>CO                     | 8<br>210               | <i>Adv. Mater.</i> , <b>2017</b> , 1704388.                     |
| TiO <sub>2</sub> -Co-ZIF-9                                                                           | 10  | CO<br>CH <sub>4</sub><br>H <sub>2</sub>   | 88<br>20<br>26         | <i>J. Mater. Chem. A</i> <b>2016</b> ; 4: 15126.                |
| CNNS-UiO-66(Zr)                                                                                      | 6   | CO                                        | 17.4                   | <i>Adv. Funct. Mater.</i> <b>2015</b> ; 25: 5360.               |
| g-C <sub>3</sub> N <sub>4</sub> -Co-ZIF-9                                                            | 2   | CO<br>H <sub>2</sub>                      | 990<br>157.2           | <i>Phys. Chem. Chem. Phys.</i> <b>2014</b> ; 16, 14656.         |
| [Ru(bpy) <sub>3</sub> ] Cl <sub>2</sub> -Co-ZIF-9                                                    | 0.5 | CO<br>H <sub>2</sub>                      | 20.9<br>15.0           | <i>Angew. Chem., Int. Ed.</i> <b>2014</b> ; 53, 1034.           |
| [Ru(bpy) <sub>3</sub> ] Cl <sub>2</sub> -Zn-ZIF-8                                                    | 0.5 | CO<br>H <sub>2</sub>                      | 1.0<br>1.2             |                                                                 |
| [Ru(bpy) <sub>3</sub> ] Cl <sub>2</sub> -Co-ZIF-67                                                   | 0.5 | CO<br>H <sub>2</sub>                      | 29600<br>14800         | <i>Phys. Chem. Chem. Phys.</i> <b>2014</b> ; 16, 14656.         |
| [Ru(bpy) <sub>3</sub> ]Cl <sub>2</sub> -MOF-253-<br>Ru(5,5'-dcbpy) (CO) <sub>2</sub> Cl <sub>2</sub> | 8   | CO<br>H <sub>2</sub><br>HCOO <sup>-</sup> | 548<br>382.4<br>1646.4 | <i>Chem. Commun.</i> <b>2015</b> ; 51, 2645.                    |

**Table S2** Sectional crystal data and structure refinements for **Co-PO<sub>4</sub>-PW<sub>12</sub>**.

|                |                                                                                                                |
|----------------|----------------------------------------------------------------------------------------------------------------|
| Formula        | C <sub>42</sub> H <sub>48</sub> Co <sub>4</sub> N <sub>24</sub> O <sub>44</sub> P <sub>2</sub> W <sub>12</sub> |
| Formula weight | 4096.90                                                                                                        |
| <i>T</i> (K)   | 296 (2)                                                                                                        |
| Crystal system | Trigonal                                                                                                       |
| Space group    | <i>R</i> -3                                                                                                    |
| <i>a</i> (Å)   | 17.545(2)                                                                                                      |
| <i>b</i> (Å)   | 17.545(2)                                                                                                      |

|                                 |                                                      |
|---------------------------------|------------------------------------------------------|
| $c$ (Å)                         | 23.684(4)                                            |
| $\beta$ (°)                     | 90                                                   |
| $V$ (Å <sup>3</sup> )           | 6313.6(17)                                           |
| $Z$                             | 3                                                    |
| $D_c$ (mg m <sup>-3</sup> )     | 3.233                                                |
| $\mu$ (mm <sup>-1</sup> )       | 17.223                                               |
| $F$ (000)                       | 5538                                                 |
| $\theta$ range (°)              | 1.592-27.330                                         |
| Crystal size (mm <sup>3</sup> ) | 0.20 × 0.13 × 0.10                                   |
| Limiting indices                | -22 ≤ $h$ ≤ 22,<br>-21 ≤ $k$ ≤ 22,<br>-30 ≤ $l$ ≤ 28 |
| Reflections collected           | 16640                                                |
| $R$ (int)                       | 0.1418                                               |
| Data / parameters               | 3006/293                                             |
| GOF on $F^2$                    | 1.069                                                |
| $R_1^a$ ,                       | $R_1 = 0.0517$ ,                                     |
| $wR_2^b [I > 2\sigma(I)]$       | $wR_2 = 0.1358$                                      |
| $R_1, wR_2$                     | $R_1 = 0.0706$ ,                                     |
| (All data)                      | $wR_2 = 0.1519$                                      |

<sup>a</sup> $R_1 = \Sigma||F_o| - |F_c||/\Sigma|F_o|$ ; <sup>b</sup>  $wR_2 = \Sigma[w(F_o^2 - F_c^2)^2]/\Sigma[w(F_o^2)^2]^{1/2}$ .
